# Supplementary material for: FGF Signaling Regulates the Number of Posterior Taste Papillae by Controlling Progenitor Field Size
Source: PubMed Central journal article supplement (PMC3107195; doi:10.1371/journal.pgen.1002098), 2011-06-02

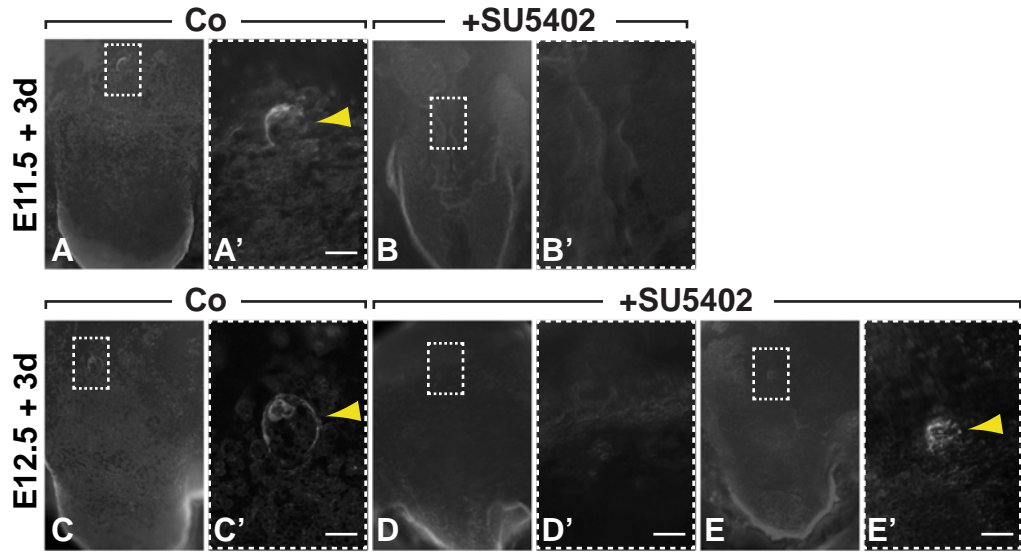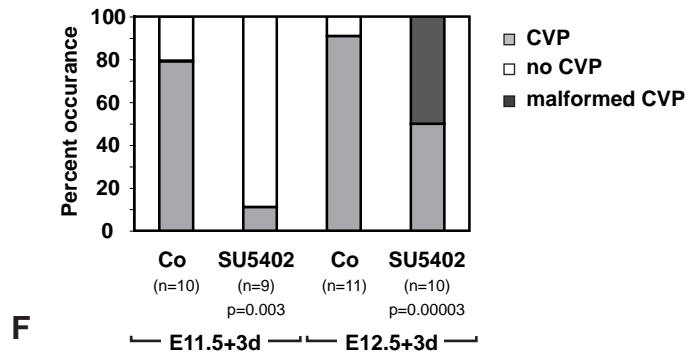

Supplement: pgen.1002098.s004.pdf [file pgen.1002098.s004.pdf]
